# Supplementary material for: Hydrodynamics of a Flexible Soft-Rayed Caudal Fin
Source: PubMed Central journal article supplement (PMC5047476; doi:10.1371/journal.pone.0163517), 2016-10-03
Supplement: pone.0163517.s002.pdf [file pone.0163517.s002.pdf]

# Drag coefficient of a fish

Hydrodynamic drag is commonly expressed as

$$D = (1/2) \rho S v^2 C_D, \quad (S1)$$

where  $\rho$  is the density of water,  $v$  is the swimming speed,  $S$  is an arbitrary reference area (it was chosen as the maximal cross section area of the body in the text), and  $C_D$  is the respective drag coefficient. The aim of this document is to furnish a crude estimate for the drag coefficient of a fish. It will be tacitly assumed that the fish generates no lift.

Drag is contributed by the body of the fish (it will be marked by the index '0') and its  $N$  fins (they will be marked by the indices '1', ..., 'N'). Based on equations (12.24) and (12.27) of Ref [1], the drag coefficient can be expressed as

$$C_D = \sum_{n=0}^N \frac{S_n}{S} C_f(\text{Re}_n) F_n I_{n0}, \quad (S2)$$

where  $S_0, \dots, S_N$  are the wet areas of the respective constituents;  $F_0, \dots, F_N$  are empirical corrections accounting for increase in drag due to flow separation;  $I_{00}, \dots, I_{N0}$  are empirical corrections accounting for an increase in drag due to hydrodynamic interaction with the body of the fish;

$$\text{Re}_n = \rho v l_n / \mu, \quad (S3)$$

is the Reynolds number based on the stream-wise dimension of the respective constituent,  $l_n$ ; and, finally,

$$C_f(\text{Re}) = 0.455 / (\log_{10} \text{Re})^{2.58} \quad (S4)$$

is the effective friction coefficient. In (S3),  $\mu$  is the viscosity of water. Equation (S4) is based on a tacit assumption that the boundary layer is turbulent.

Approximating the body by a double-ogive of length  $l_0$  and maximal diameter  $d_0$ ,

$$S_0 = (2/3)\pi l_0 d_0. \quad (\text{S5})$$

Based on equation (12.31) of Ref [1],

$$F_0 = 1 + 60(d_0/l_0)^3 + 0.0025(l_0/d_0). \quad (\text{S6})$$

Because there is no hydrodynamic interaction between the body and itself,  $I_{00}$  should have been unity. Nonetheless, we set  $I_{00} = 1.1$  to account, at least partially, for the drag of the gills.

$S_1, \dots, S_N$  are, approximately, twice the projected areas of the respective fins. Based on equation (12.30) of Ref [1],

$$F_n \approx 1 + 2(t_n/l_n) + 100(t_n/l_n)^3, \quad (\text{S7})$$

where  $t_1, \dots, t_N$  are the thicknesses of the fins.  $I_{n0} = 1.4$  is set for every  $n > 0$  based on the suggestion appearing on page 283 *ibid*.

Choosing the reference area  $S$  as the maximal cross section area of the body, the contribution of the body,  $(S_0/S)C_f(\text{Re}_0)F_0I_{00}$ , is shown in Fig S1a as a function of the respective Reynolds number and the ratio  $l_0/d_0$ . The contribution  $C_f(\text{Re}_n)F_nI_{n0}$  of the  $n$ th fin is shown on Fig 1b.

For example, consider a 1 m fish, 0.18 m across, moving at 1 body length per second in 25°C water. The fish has a few similar fins with thickness-to-chord ratio of 0.1 and 0.05 m chord, their combined area that is twice the cross section area of the body. The Reynolds number, based on the body length, is  $10^6$ , by (S3). From Fig S1a,  $(S_0/S)C_f(\text{Re}_0)F_0I_{00} \approx (1) \cdot 0.1 = 0.1$ . The Reynolds number, based on the fin chord, is 50,000. From Fig S2b,  $\sum_{n=1}^N (S_n/S)C_f(\text{Re}_n)F_nI_{n0} \approx (2) \cdot 0.014 = 0.028$ . The drag coefficient of the fish, based on its cross section area, is the sum of the two, approximately, 0.13.

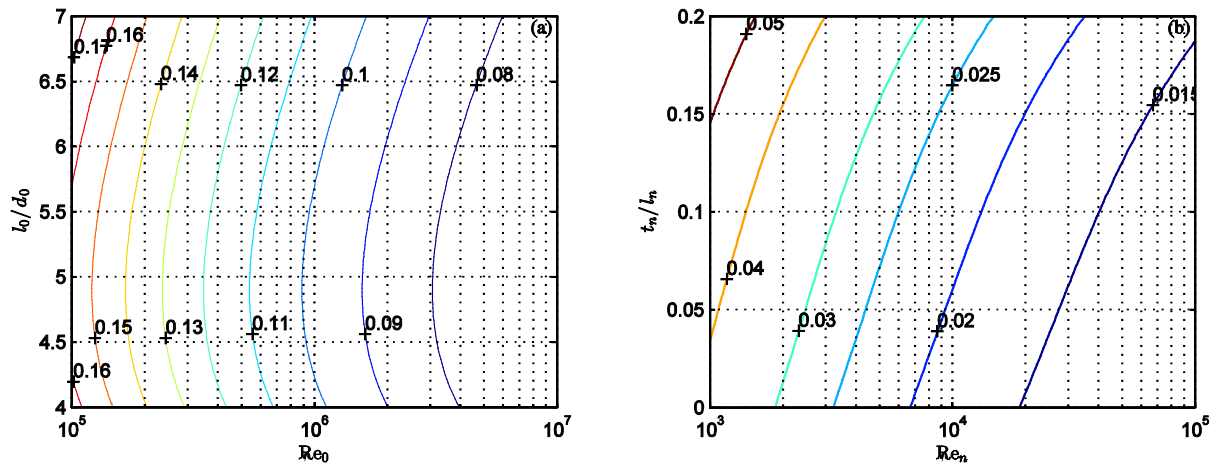

**Fig S1:** Contours of constant drag coefficient over the map of a shape parameter and the Reynolds number. Drag coefficient of the body (based on its cross section area) is shown on the left; the shape parameter is the length-to-diameter ratio. Drag coefficient of a fin (based on its wet area) is shown on the right; the shape parameter is the thickness-to-chord ratio.

## References

- [1] Raymer D.P., *Aircraft design: a conceptual approach*, AIAA educational series, Washington DC, 1992, pp 279-281
